# Supplementary material
Source: MDPI journal article supplement (https://www.mdpi.com/2311-7524/9/6/726)
Supplement: s1 [file s1]

## **Supplementary Information**

### **Genetic Diversity and Population Structure of a Longan Germplasm in Thailand revealed by Genotyping-By-Sequencing (GBS)**

Kanamon Riangwong, Chatree Saensuk, Mutiara K. Pitaloka, Reajina Dumhai, Vinitchan Ruanjaichon,  
Theerayut Toojinda, Samart Wanchana, Siwaret Arikrit

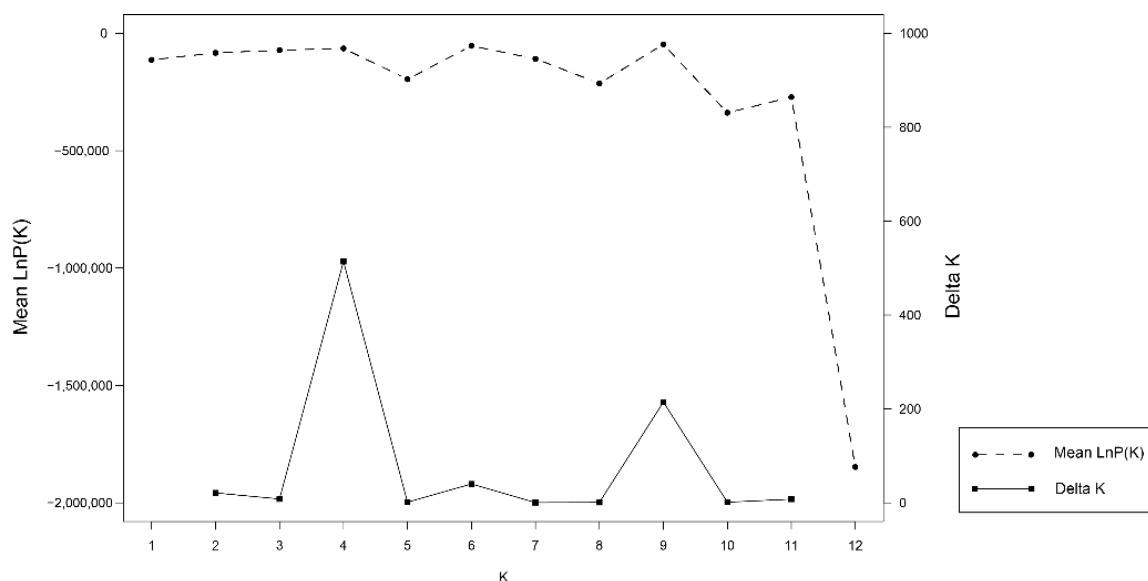

**Figure S1.** The average log-likelihood of the K-value against the number of K and delta K for different numbers of subpopulations (K)

**Table S1** List of longan accessions used for GWAS analysis

| List | Accession | Name           | Source                   | Fruit shape | Fruit symmetry | Cross-section of fruit | Color of skin   |
|------|-----------|----------------|--------------------------|-------------|----------------|------------------------|-----------------|
| 1    | ACC01     | Daw Kathi      | Longan Community BioBank | Oblate      | Symmetry       | Broadly elliptic       | Brownish green  |
| 2    | ACC02     | E-daw #1       | Longan Community BioBank | Oblate      | Symmetry       | Broadly elliptic       | Brownish green  |
| 3    | ACC03     | E-daw #2       | Longan Community BioBank | Oblate      | Symmetry       | Broadly elliptic       | Brownish green  |
| 4    | ACC04     | Biew Khiew #1  | Longan Community BioBank | Oblate      | Oblique        | Broadly elliptic       | Yellowish brown |
| 5    | ACC05     | Puang Thong #1 | Longan Community BioBank | Oblate      | Moderate       | Broadly elliptic       | Yellowish brown |
| 6    | ACC06     | E-daw #3       | Longan Community BioBank | Oblate      | Symmetry       | Broadly elliptic       | Brownish green  |
| 7    | ACC07     | E-daw #4       | Longan Community BioBank | Oblate      | Symmetry       | Broadly elliptic       | Brownish green  |
| 8    | ACC08     | E-daw #5       | Longan Community BioBank | Oblate      | Symmetry       | Broadly elliptic       | Brownish green  |
| 9    | ACC09     | Biew Khiew #2  | Longan Community BioBank | Oblate      | Oblique        | Broadly elliptic       | Yellowish brown |
| 10   | ACC10     | Kaew Yee       | Longan Community BioBank | Oblate      | Moderate       | Round                  | Yellowish brown |
| 11   | ACC11     | E-daw #6       | Longan Community BioBank | Oblate      | Symmetry       | Broadly elliptic       | Brownish green  |
| 12   | ACC12     | E-daw #7       | Longan Community BioBank | Oblate      | Symmetry       | Broadly elliptic       | Brownish green  |
| 13   | ACC13     | E-daw #8       | Longan Community BioBank | Oblate      | Symmetry       | Broadly elliptic       | Brownish green  |
| 14   | ACC14     | Kohala         | Longan Community BioBank | -           | -              | -                      | -               |
| 15   | ACC15     | E-daw #9       | Longan Community BioBank | Oblate      | Symmetry       | Broadly elliptic       | Brownish green  |
| 16   | ACC16     | E-daw #10      | Longan Community BioBank | Oblate      | Symmetry       | Broadly elliptic       | Brownish green  |
| 17   | ACC17     | E-daw #11      | Longan Community BioBank | Oblate      | Symmetry       | Broadly elliptic       | Brownish green  |

|    |       |                |                          |         |          |                  |                 |
|----|-------|----------------|--------------------------|---------|----------|------------------|-----------------|
| 18 | ACC18 | E-daw #12      | Longan Community BioBank | Oblate  | Symmetry | Broadly elliptic | Brownish green  |
| 19 | ACC19 | E-daw #13      | Longan Community BioBank | Oblate  | Symmetry | Broadly elliptic | Brownish green  |
| 20 | ACC20 | E-daw #14      | Longan Community BioBank | Oblate  | Symmetry | Broadly elliptic | Brownish green  |
| 21 | ACC21 | Biew Khiew #3  | Longan Community BioBank | Oblate  | Oblique  | Broadly elliptic | Yellowish brown |
| 22 | ACC22 | E-daw #15      | Longan Community BioBank | Oblate  | Symmetry | Broadly elliptic | Brownish green  |
| 23 | ACC23 | E-daw #16      | Longan Community BioBank | Oblate  | Symmetry | Broadly elliptic | Brownish green  |
| 24 | ACC24 | Chompoo #1     | Longan Community BioBank | Rounded | Symmetry | globular         | Yellowish brown |
| 25 | ACC25 | Chuliang       | Longan Community BioBank | -       | -        | -                | -               |
| 26 | ACC26 | E-daw #17      | Longan Community BioBank | Oblate  | Symmetry | Broadly elliptic | Brownish green  |
| 27 | ACC27 | Krob Kathi #1  | Longan Community BioBank | Oblate  | Moderate | Broadly elliptic | Yellowish brown |
| 28 | ACC28 | E-daw #18      | Longan Community BioBank | Oblate  | Symmetry | Broadly elliptic | Brownish green  |
| 29 | ACC29 | Biew Khiew #4  | Longan Community BioBank | Oblate  | Oblique  | Broadly elliptic | Yellowish brown |
| 30 | ACC30 | E-daw #19      | Longan Community BioBank | Oblate  | Symmetry | Broadly elliptic | Brownish green  |
| 31 | ACC31 | Puang Thong #2 | Longan Community BioBank | Oblate  | Moderate | Broadly elliptic | Yellowish brown |
| 32 | ACC32 | Krob Kathi #2  | Longan Community BioBank | Oblate  | Moderate | Broadly elliptic | Yellowish brown |
| 33 | ACC33 | Chompoo #2     | Longan Community BioBank | Rounded | Symmetry | globular         | Yellowish brown |
| 34 | ACC34 | Biew Khiew #5  | Longan Community BioBank | Oblate  | Oblique  | Broadly elliptic | Yellowish brown |
| 35 | ACC35 | Haew Yod Daeng | Longan Community BioBank | Oblate  | Moderate | Broadly elliptic | Yellowish brown |
| 36 | ACC36 | E-daw #20      | Longan Community BioBank | Oblate  | Symmetry | Broadly elliptic | Brownish green  |
| 37 | ACC37 | Biew Khiew #6  | Longan Community BioBank | Oblate  | Oblique  | Broadly elliptic | Yellowish brown |
| 38 | ACC38 | Puang Thong #3 | Longan Community BioBank | Oblate  | Moderate | Broadly elliptic | Yellowish brown |
| 39 | ACC39 | Puang Thong #4 | Longan Community BioBank | Oblate  | Moderate | Broadly elliptic | Yellowish brown |
| 40 | ACC40 | Chompoo #3     | Longan Community BioBank | Rounded | Symmetry | globular         | Yellowish brown |
| 41 | ACC41 | E-daw #21      | Longan Community BioBank | Oblate  | Symmetry | Broadly elliptic | Brownish green  |
| 42 | ACC42 | Krob Kathi #3  | Longan Community BioBank | Oblate  | Moderate | Broadly elliptic | Yellowish brown |
| 43 | ACC43 | Chompoo #4     | Longan Community BioBank | Rounded | Symmetry | globular         | Yellowish brown |
| 44 | ACC44 | E-daw #22      | Longan Community BioBank | Oblate  | Symmetry | Broadly elliptic | Brownish green  |
| 45 | ACC45 | E-daw #23      | Longan Community BioBank | Oblate  | Symmetry | Broadly elliptic | Brownish green  |
| 46 | ACC46 | E-daw #24      | Longan Community BioBank | Oblate  | Symmetry | Broadly elliptic | Brownish green  |
| 47 | ACC47 | Chompoo #5     | Longan Community BioBank | Rounded | Symmetry | globular         | Yellowish brown |
| 48 | ACC48 | E-daw #25      | Longan Community BioBank | Oblate  | Symmetry | Broadly elliptic | Brownish green  |
| 49 | ACC49 | Biew Khiew #7  | Longan Community BioBank | Oblate  | Moderate | Broadly elliptic | Yellowish brown |
| 50 | ACC50 | E-daw #26      | Longan Community BioBank | Oblate  | Symmetry | Broadly elliptic | Brownish green  |

---

**Table S2** Summary of 210,882 total SNPs identified based on GBS data in each longan accession

| Accession | Name           | Hom.<br>SNP | Hom.<br>Rate<br>(%) | Het.<br>SNP | Het rate<br>(%) | Missing<br>SNP | Missing<br>rate<br>(%) |
|-----------|----------------|-------------|---------------------|-------------|-----------------|----------------|------------------------|
| ACC01     | Daw Kathi      | 67577       | 32.04               | 12171       | 5.77            | 131134         | 62.18                  |
| ACC02     | E-daw #1       | 88189       | 41.82               | 26427       | 12.53           | 96266          | 45.65                  |
| ACC03     | E-daw #2       | 81270       | 38.54               | 21833       | 10.35           | 107779         | 51.11                  |
| ACC04     | Biew Khiew #1  | 58622       | 27.80               | 10026       | 4.75            | 142234         | 67.45                  |
| ACC05     | Puang Thong #1 | 80927       | 38.38               | 20218       | 9.59            | 109737         | 52.04                  |
| ACC06     | E-daw #3       | 67583       | 32.05               | 15692       | 7.44            | 127607         | 60.51                  |
| ACC07     | E-daw #4       | 59826       | 28.37               | 12751       | 6.05            | 138305         | 65.58                  |
| ACC08     | E-daw #5       | 71183       | 33.75               | 16800       | 7.97            | 122899         | 58.28                  |
| ACC09     | Biew Khiew #2  | 68446       | 32.46               | 12580       | 5.97            | 129856         | 61.58                  |
| ACC10     | Kaew Yee       | 80010       | 37.94               | 17830       | 8.45            | 113042         | 53.60                  |
| ACC11     | E-daw #6       | 88035       | 41.75               | 26031       | 12.34           | 96816          | 45.91                  |
| ACC12     | E-daw #7       | 74053       | 35.12               | 18365       | 8.71            | 118464         | 56.18                  |
| ACC13     | E-daw #8       | 65905       | 31.25               | 14216       | 6.74            | 130761         | 62.01                  |
| ACC14     | Kohala         | 85182       | 40.39               | 12432       | 5.90            | 113268         | 53.71                  |
| ACC15     | E-daw #9       | 65329       | 30.98               | 14353       | 6.81            | 131200         | 62.21                  |
| ACC16     | E-daw #10      | 79603       | 37.75               | 21455       | 10.17           | 109824         | 52.08                  |
| ACC17     | E-daw #11      | 74863       | 35.50               | 18931       | 8.98            | 117088         | 55.52                  |
| ACC18     | E-daw #12      | 74670       | 35.41               | 19469       | 9.23            | 116743         | 55.36                  |
| ACC19     | E-daw #13      | 76792       | 36.41               | 19571       | 9.28            | 114519         | 54.30                  |
| ACC20     | E-daw #14      | 64722       | 30.69               | 11360       | 5.39            | 134800         | 63.92                  |
| ACC21     | Biew Khiew #3  | 72088       | 34.18               | 14819       | 7.03            | 123975         | 58.79                  |
| ACC22     | E-daw #15      | 66106       | 31.35               | 14045       | 6.66            | 130731         | 61.99                  |
| ACC23     | E-daw #16      | 69948       | 33.17               | 16059       | 7.62            | 124875         | 59.22                  |
| ACC24     | Chompoo #1     | 80738       | 38.29               | 18104       | 8.58            | 112040         | 53.13                  |
| ACC25     | Chuliang       | 75473       | 35.79               | 11771       | 5.58            | 123638         | 58.63                  |
| ACC26     | E-daw #17      | 75866       | 35.98               | 19526       | 9.26            | 115490         | 54.77                  |
| ACC27     | Krob Kathi #1  | 72099       | 34.19               | 12831       | 6.08            | 125952         | 59.73                  |
| ACC28     | E-daw #18      | 78660       | 37.30               | 20266       | 9.61            | 111956         | 53.09                  |
| ACC29     | Biew Khiew #4  | 78482       | 37.22               | 16873       | 8.00            | 115527         | 54.78                  |
| ACC30     | E-daw #19      | 70475       | 33.42               | 16507       | 7.83            | 123900         | 58.75                  |
| ACC31     | Puang Thong #2 | 73056       | 34.64               | 16797       | 7.97            | 121029         | 57.39                  |
| ACC32     | Krob Kathi #2  | 52394       | 24.85               | 6783        | 3.22            | 151705         | 71.94                  |
| ACC33     | Chompoo #2     | 70052       | 33.22               | 13662       | 6.48            | 127168         | 60.30                  |
| ACC34     | Biew Khiew #5  | 83939       | 39.80               | 17538       | 8.32            | 109405         | 51.88                  |
| ACC35     | Haew Yod Daeng | 69582       | 33.00               | 15911       | 7.54            | 125389         | 59.46                  |
| ACC36     | E-daw #20      | 61498       | 29.16               | 12631       | 5.99            | 136753         | 64.85                  |
| ACC37     | Biew Khiew #6  | 87342       | 41.42               | 20129       | 9.55            | 103411         | 49.04                  |
| ACC38     | Puang Thong #3 | 77409       | 36.71               | 18410       | 8.73            | 115063         | 54.56                  |
| ACC39     | Puang Thong #4 | 69932       | 33.16               | 15077       | 7.15            | 125873         | 59.69                  |
| ACC40     | Chompoo #3     | 67072       | 31.81               | 12733       | 6.04            | 131077         | 62.16                  |
| ACC41     | E-daw #21      | 64127       | 30.41               | 13933       | 6.61            | 132822         | 62.98                  |
| ACC42     | Krob Kathi #3  | 63710       | 30.21               | 9955        | 4.72            | 137217         | 65.07                  |
| ACC43     | Chompoo #4     | 76857       | 36.45               | 16027       | 7.60            | 117998         | 55.95                  |
| ACC44     | E-daw #22      | 71876       | 34.08               | 17064       | 8.09            | 121942         | 57.82                  |
| ACC45     | E-daw #23      | 54704       | 25.94               | 8881        | 4.21            | 147297         | 69.85                  |
| ACC46     | E-daw #24      | 72053       | 34.17               | 15623       | 7.41            | 123206         | 58.42                  |
| ACC47     | Chompoo #5     | 67533       | 32.02               | 11151       | 5.29            | 132198         | 62.69                  |
| ACC48     | E-daw #25      | 63195       | 29.97               | 11711       | 5.55            | 135976         | 64.48                  |
| ACC49     | Biew Khiew #7  | 64933       | 30.79               | 10843       | 5.14            | 135106         | 64.07                  |
| ACC50     | E-daw #26      | 57366       | 27.20               | 8099        | 3.84            | 145417         | 68.96                  |

**Table S3** Summary of 10,619 filtered SNPs in each longan accession

| Accession | Name           | Homozygous<br>SNP | Homozygous<br>rate (%) | Heterozygous<br>SNP | Heterozygous<br>rate (%) |
|-----------|----------------|-------------------|------------------------|---------------------|--------------------------|
| ACC01     | Daw Kathi      | 6859              | 64.59                  | 3760                | 35.41                    |
| ACC02     | E-daw #1       | 5909              | 55.65                  | 4710                | 44.35                    |
| ACC03     | E-daw #2       | 5937              | 55.91                  | 4682                | 44.09                    |
| ACC04     | Biew Khiew #1  | 6889              | 64.87                  | 3730                | 35.13                    |
| ACC05     | Puang Thong #1 | 6020              | 56.69                  | 4599                | 43.31                    |
| ACC06     | E-daw #3       | 6156              | 57.97                  | 4463                | 42.03                    |
| ACC07     | E-daw #4       | 6364              | 59.93                  | 4255                | 40.07                    |
| ACC08     | E-daw #5       | 6114              | 57.58                  | 4505                | 42.42                    |
| ACC09     | Biew Khiew #2  | 7088              | 66.75                  | 3531                | 33.25                    |
| ACC10     | Kaew Yee       | 6621              | 62.35                  | 3998                | 37.65                    |
| ACC11     | E-daw #6       | 5928              | 55.82                  | 4691                | 44.18                    |
| ACC12     | E-daw #7       | 6065              | 57.11                  | 4554                | 42.89                    |
| ACC13     | E-daw #8       | 6321              | 59.53                  | 4298                | 40.47                    |
| ACC14     | Kohala         | 8518              | 80.21                  | 2101                | 19.79                    |
| ACC15     | E-daw #9       | 6289              | 59.22                  | 4330                | 40.78                    |
| ACC16     | E-daw #10      | 5954              | 56.07                  | 4665                | 43.93                    |
| ACC17     | E-daw #11      | 6034              | 56.82                  | 4585                | 43.18                    |
| ACC18     | E-daw #12      | 6042              | 56.90                  | 4577                | 43.10                    |
| ACC19     | E-daw #13      | 6029              | 56.78                  | 4590                | 43.22                    |
| ACC20     | E-daw #14      | 6938              | 65.34                  | 3681                | 34.66                    |
| ACC21     | Biew Khiew #3  | 6570              | 61.87                  | 4049                | 38.13                    |
| ACC22     | E-daw #15      | 6316              | 59.48                  | 4303                | 40.52                    |
| ACC23     | E-daw #16      | 6194              | 58.33                  | 4425                | 41.67                    |
| ACC24     | Chompoo #1     | 6418              | 60.44                  | 4201                | 39.56                    |
| ACC25     | Chuliang       | 8366              | 78.78                  | 2253                | 21.22                    |
| ACC26     | E-daw #17      | 6090              | 57.35                  | 4529                | 42.65                    |
| ACC27     | Krob Kathi #1  | 7107              | 66.93                  | 3512                | 33.07                    |
| ACC28     | E-daw #18      | 6056              | 57.03                  | 4563                | 42.97                    |
| ACC29     | Biew Khiew #4  | 6566              | 61.83                  | 4053                | 38.17                    |
| ACC30     | E-daw #19      | 6147              | 57.89                  | 4472                | 42.11                    |
| ACC31     | Puang Thong #2 | 6086              | 57.31                  | 4533                | 42.69                    |
| ACC32     | Krob Kathi #2  | 7833              | 73.76                  | 2786                | 26.24                    |
| ACC33     | Chompoo #2     | 6524              | 61.44                  | 4095                | 38.56                    |
| ACC34     | Biew Khiew #5  | 6915              | 65.12                  | 3704                | 34.88                    |
| ACC35     | Haew Yod Daeng | 6089              | 57.34                  | 4530                | 42.66                    |
| ACC36     | E-daw #20      | 6410              | 60.36                  | 4209                | 39.64                    |
| ACC37     | Biew Khiew #6  | 6395              | 60.22                  | 4224                | 39.78                    |
| ACC38     | Puang Thong #3 | 6060              | 57.07                  | 4559                | 42.93                    |
| ACC39     | Puang Thong #4 | 6249              | 58.85                  | 4370                | 41.15                    |
| ACC40     | Chompoo #3     | 6601              | 62.16                  | 4018                | 37.84                    |
| ACC41     | E-daw #21      | 6325              | 59.56                  | 4294                | 40.44                    |
| ACC42     | Krob Kathi #3  | 7292              | 68.67                  | 3327                | 31.33                    |
| ACC43     | Chompoo #4     | 6448              | 60.72                  | 4171                | 39.28                    |
| ACC44     | E-daw #22      | 6143              | 57.85                  | 4476                | 42.15                    |
| ACC45     | E-daw #23      | 7181              | 67.62                  | 3438                | 32.38                    |
| ACC46     | E-daw #24      | 6213              | 58.51                  | 4406                | 41.49                    |
| ACC47     | Chompoo #5     | 6993              | 65.85                  | 3626                | 34.15                    |
| ACC48     | E-daw #25      | 6741              | 63.48                  | 3878                | 36.52                    |
| ACC49     | Biew Khiew #7  | 6924              | 65.20                  | 3695                | 34.80                    |
| ACC50     | E-daw #26      | 7516              | 70.78                  | 3103                | 29.22                    |

**Table S4** Clusters of 50 longan accessions identified by STRUCTURE and UPGMA tree

| Accession | Name           | STRUCTURE | UPGMA tree |
|-----------|----------------|-----------|------------|
| ACC34     | Biew Khiew #5  | G4        | C2.1       |
| ACC09     | Biew Khiew #2  | G4        | C2.1       |
| ACC27     | Krob Kathi #1  | G4        | C2.1       |
| ACC42     | Krob Kathi #3  | G4        | C2.1       |
| ACC32     | Krob Kathi #2  | G4        | C2.1       |
| ACC49     | Biew Khiew #7  | G2        | C2.2       |
| ACC24     | Chompoo #1     | G2        | C2.2       |
| ACC21     | Biew Khiew #3  | G2        | C2.2       |
| ACC37     | Biew Khiew #6  | G2        | C2.2       |
| ACC29     | Biew Khiew #4  | G2        | C2.2       |
| ACC04     | Biew Khiew #1  | G2        | C2.2       |
| ACC50     | E-daw #26      | G1        | C1         |
| ACC45     | E-daw #23      | G1        | C1         |
| ACC03     | E-daw #2       | G1        | C1         |
| ACC44     | E-daw #22      | G1        | C1         |
| ACC07     | E-daw #4       | G1        | C1         |
| ACC41     | E-daw #21      | G1        | C1         |
| ACC02     | E-daw #1       | G1        | C1         |
| ACC19     | E-daw #13      | G1        | C1         |
| ACC12     | E-daw #7       | G1        | C1         |
| ACC16     | E-daw #10      | G1        | C1         |
| ACC11     | E-daw #6       | G1        | C1         |
| ACC18     | E-daw #12      | G1        | C1         |
| ACC28     | E-daw #18      | G1        | C1         |
| ACC26     | E-daw #17      | G1        | C1         |
| ACC17     | E-daw #11      | G1        | C1         |
| ACC23     | E-daw #16      | G1        | C1         |
| ACC08     | E-daw #5       | G1        | C1         |
| ACC30     | E-daw #19      | G1        | C1         |
| ACC06     | E-daw #3       | G1        | C1         |
| ACC46     | E-daw #24      | G1        | C1         |
| ACC22     | E-daw #15      | G1        | C1         |
| ACC15     | E-daw #9       | G1        | C1         |
| ACC13     | E-daw #8       | G1        | C1         |
| ACC36     | E-daw #20      | G1        | C1         |
| ACC48     | E-daw #25      | G1        | C1         |
| ACC05     | Puang Thong #1 | G3        | C4         |

|       |                |           |       |
|-------|----------------|-----------|-------|
| ACC31 | Puang Thong #2 | G3        | C4    |
| ACC38 | Puang Thong #3 | G3        | C4    |
| ACC39 | Puang Thong #4 | G3        | C4    |
| ACC01 | Daw Kathi      | G3        | C3    |
| ACC20 | E-daw #14      | G3        | C3    |
| ACC10 | Kaew Yee       | G3        | C3    |
| ACC33 | Chompoo #2     | Admixture | ADMX1 |
| ACC43 | Chompoo #4     | Admixture | ADMX1 |
| ACC40 | Chompoo #3     | Admixture | ADMX1 |
| ACC47 | Chompoo #5     | Admixture | ADMX1 |
| ACC35 | Haew Yod Daeng | Admixture | ADMX1 |
| ACC25 | Chuliang       | Admixture | ADMX2 |
| ACC14 | Kohala         | Admixture | ADMX2 |

---
